# Supplementary material for: Imprinted polymer beads enabling direct and selective molecular separation in water
Source: Royal Society of Chemistry journal article supplement (doi:10.1039/c2sm25574j), 2012-01-01
Supplement: c2sm25574j.pdf [file c2sm25574j.pdf]

## Electronic Supplementary Information

# Imprinted Polymer Beads Enabling Direct and Selective Molecular Separation in Water†

Xiantao Shen,<sup>‡</sup> Changgang Xu<sup>‡</sup> and Lei Ye\*

Division of Pure and Applied Biochemistry, Lund University, Box 124, 221 00 Lund, Sweden

Tel: +46 46 2229560; Fax: +46 46 2224611; Email: lei.ye@tbiokem.lth.se

### 1. BET surface area

The BET surface area of the polymer particles are shown in Table S1.

**Table S1** BET surface area of polymer particles.

| Type of particles | Synthetic method   | Volume of porogen used (μL) | BET surface area (m <sup>2</sup> g <sup>-1</sup> ) | Average pore diameter (Å) |
|-------------------|--------------------|-----------------------------|----------------------------------------------------|---------------------------|
| MIP-P2            | Pickering emulsion | 200                         | 0.85                                               | 198.0                     |
| NIP-P2            | Pickering emulsion | 200                         | 0.69                                               | 291.6                     |
| MIP-P4            | Pickering emulsion | 1000                        | 198.3                                              | 92.4                      |
| MIP-B             | Bulk               | 200                         | 22.8                                               | 145.6                     |
| NIP-B             | Bulk               | 200                         | 15.9                                               | 147.8                     |

### 2. LC-MS/MS Chromatograms

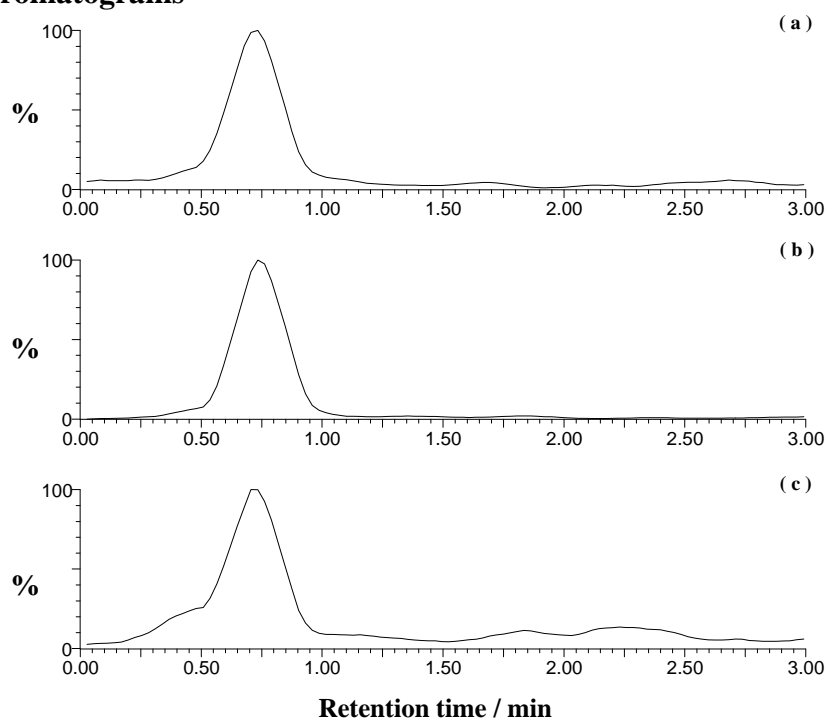

**Fig. S1** HPLC-MS/MS chromatograms of pindolol obtained from spiked tap water before (a) and after SPE treatment with MIP-P2 (b) and with NIP-P2 (c).

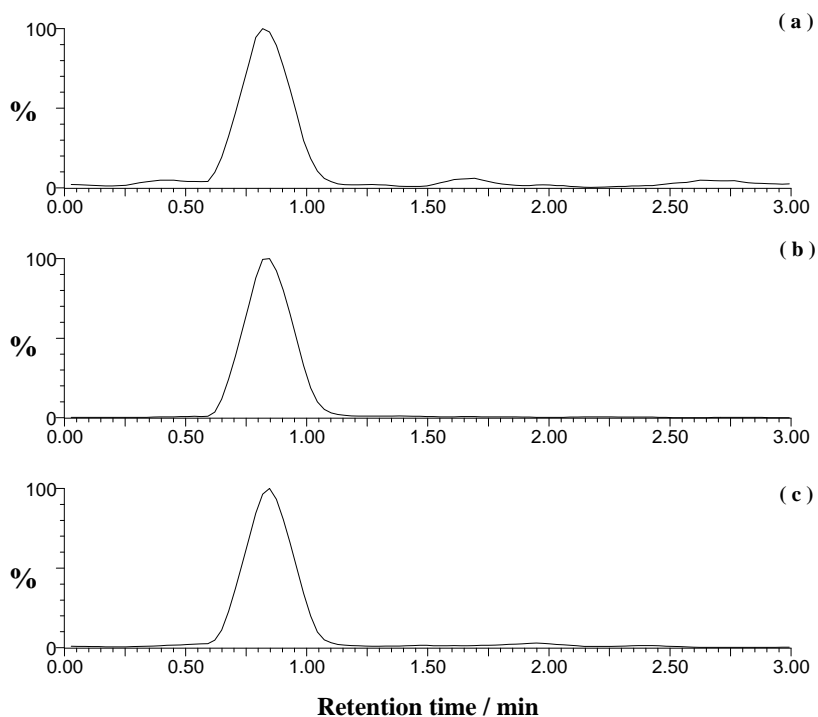

**Fig. S2** HPLC-MS/MS chromatograms of metoprolol obtained from spiked tap water before (a) and after SPE treatment with MIP-P2 (b) and with NIP-P2 (c).

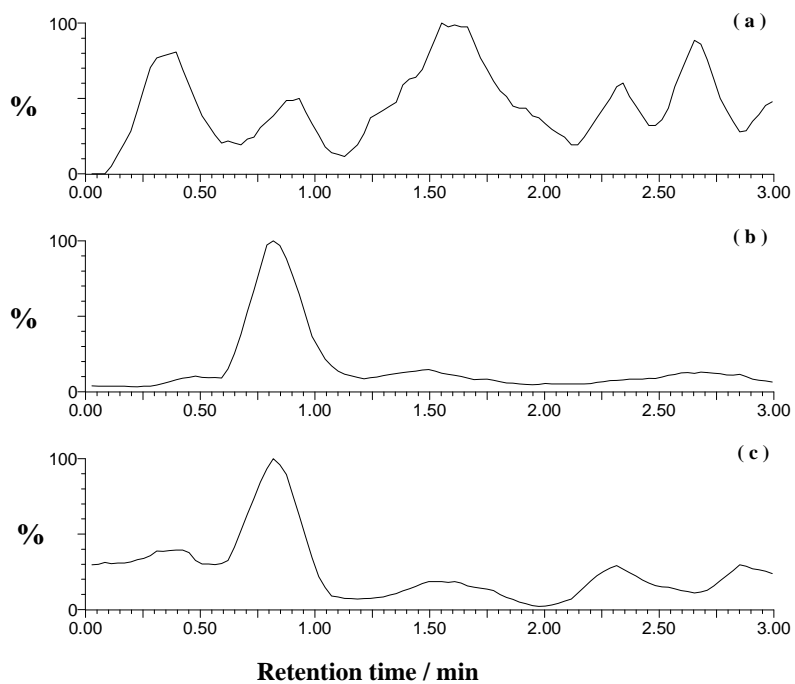

**Fig. S3** HPLC-MS/MS chromatograms of timolol obtained from spiked tap water before (a) and after SPE treatment with MIP-P2 (b) and with NIP-P2 (c).
